# Supplementary material for: The evidence for Mycobacterium avium subspecies paratuberculosis (MAP) as a cause of nonsolar uveal melanoma: a narrative review
Source: PubMed Central journal article supplement — Transl Cancer Res. 2022 Dec 16;12(2):398–412. doi: 10.21037/tcr-22-2540 (PMC10007888; doi:10.21037/tcr-22-2540), 2022-12-16
Supplement: tcr-12-02-398-rc.pdf [file tcr-12-02-398-rc.pdf]

## Narrative Review Checklist

| Section/Topic             | Item No | Item                                                                                                                                                                               | Reported on Page Number/Line Number | Reported on Section/Paragraph |
|---------------------------|---------|------------------------------------------------------------------------------------------------------------------------------------------------------------------------------------|-------------------------------------|-------------------------------|
| <b>TITLE</b>              |         |                                                                                                                                                                                    |                                     |                               |
| Title                     | 1       | Identify the report as a Narrative Review or Literature Review.                                                                                                                    | P 1, L 1                            | Title                         |
| <b>ABSTRACT</b>           |         |                                                                                                                                                                                    |                                     |                               |
| Structured summary        | 2       | Provide a structured summary with the subsections as: Background and Objective, Methods, Key Content and Findings, Conclusions.                                                    | P 2, L 17-34                        | Abstract                      |
| <b>INTRODUCTION</b>       |         |                                                                                                                                                                                    |                                     |                               |
| Rationale/background      | 3       | Describe the rationale for the review in the context of what is already known.                                                                                                     | P 3-5, L 39-100                     | Introduction                  |
| Objectives                | 4       | Specify the key question(s) identified for the review topic.                                                                                                                       | P 5, L 98-100                       | Introduction                  |
| <b>METHODS</b>            |         |                                                                                                                                                                                    |                                     |                               |
| Research selection        | 5       | Specify the process for identifying the literature search (eg, years considered, language, publication status, study design, and databases of coverage).                           | P 5-6, L 102-120                    | Materials and Methods         |
| <b>DISCUSSION/SUMMARY</b> |         |                                                                                                                                                                                    |                                     |                               |
| Narrative                 | 6       | Discuss: 1) research reviewed including fundamental or key findings, 2) limitations and/or quality of research reviewed, and 3) need for future research.                          | P 6, L 121-350                      | Synthesis of the Literature   |
| Summary                   | 7       | Provide an overall interpretation of the narrative review in the context of clinical practice for health professionals, policy development and implementation, or future research. | P 16-17, L 352-396                  | Conclusions                   |
